# Supplementary material for: Molecular differences of angiogenic versus vessel co-opting colorectal cancer liver metastases at single-cell resolution
Source: PubMed Central journal article supplement (PMC9872436; doi:10.1186/s12943-023-01713-1), 2023-01-24
Supplement: 12943_2023_1713_MOESM1_ESM.pdf [file 12943_2023_1713_MOESM1_ESM.pdf]

## Supplementary Table 1a-b. Related to Figure 1 and Figure S1

### a. Clinical Characteristics of 225 patients resected for CRCLM

|                                                |                                                 | Patients (No.) |
|------------------------------------------------|-------------------------------------------------|----------------|
| <b>Total (No.)</b>                             |                                                 | 225            |
| <b>Sex (No.)</b>                               | Female                                          | 84             |
|                                                | Male                                            | 141            |
| <b>Age at time of CRCLM resection (Years)</b>  | Mean                                            | 63,04          |
|                                                | Min                                             | 33             |
|                                                | Max                                             | 84             |
| <b>initial postoperative UICC (No.)</b>        | I                                               | 13             |
|                                                | II                                              | 42             |
|                                                | III                                             | 50             |
|                                                | IV                                              | 117            |
| <b>Localization of the primary tumor (No.)</b> | Coecum to Colon ascendens                       | 24             |
|                                                | Right colic flexure to Colon descendens + Sigma | 68             |
|                                                | Rectum                                          | 133            |

*Note:*

*Patients were resected for CRCLM in a timeframe of 1995-2015; Initial postoperative UICC describes UICC at timepoint of resection of primary tumor; Neoadjuvant treatment: within 6 months prior to CRCLM resection*

### b. Multivariate analysis from CRCLM patients in cohorts Figure 1c-d

| Variables           |                                                 | Hazard Ratio (HR) | P value   |
|---------------------|-------------------------------------------------|-------------------|-----------|
| <b>dHGP</b>         | <i>Unpure - 100%</i>                            | 0.4266571         | 0.0002819 |
| <b>pUICC</b>        | I -                                             |                   |           |
|                     | II                                              | 1.0762858         | 0.8669213 |
|                     | III                                             | 1.4598015         | 0.3730300 |
|                     | IV                                              | 1.8509338         | 0.1266244 |
| <b>Age</b>          | <= 60 -                                         |                   |           |
|                     | age 61-70                                       | 0.9764811         | 0.9018906 |
|                     | age>70                                          | 1.5242961         | 0.0508221 |
| <b>Gender</b>       | F -                                             |                   |           |
|                     | M                                               | 0.7618939         | 0.1137023 |
| <b>Localization</b> | Rectum -                                        |                   |           |
|                     | Right colic flexure to Colon descendens + sigma | 0.9574421         | 0.8142765 |
|                     | Coecum to Colon ascendens                       | 1.8482461         | 0.0211604 |

*Multivariate Cox Proportional Hazards Analysis for Overall Survival, performed with the variables dHGP (=100%), pUICC, age, gender and localization*

## Supplementary Table 2. Related to Figure 2.

### Clinical Characteristics of 6 patients resected for CRCLM used for spaRNASeq

| <b>PT-ID</b> | <b>HGP</b> | <b>Gender</b> | <b>Age at resection</b> | <b>Year of resection</b> | <b>Initial postop. UICC</b> | <b>Location primary tumor</b> | <b>MS status</b> | <b>KRAS mutation</b> | <b>RAS inhibition</b> | <b>Pre-treatment</b> |
|--------------|------------|---------------|-------------------------|--------------------------|-----------------------------|-------------------------------|------------------|----------------------|-----------------------|----------------------|
| PT36         | rHGP       | Male          | 68                      | 2020                     | IV                          | Rectum                        | MSS              | yes                  | No                    | FOLFIRI, Bevacizumab |
| PT44         | rHGP       | Female        | 69                      | 2020                     | III                         | Colon asc.                    | MSS              | No                   | No                    | No                   |
| PT54         | rHGP       | Female        | 53                      | 2020                     | IV                          | Rectum                        | MSS              | No                   | No                    | FOLFOX               |
| PT55         | dHGP       | Female        | 67                      | 2020                     | IV                          | Rectum                        | MSS              | Gly12Val             | Candesartan           | No                   |
| PT68         | dHGP       | Female        | 62                      | 2021                     | I                           | Rectum                        | MSS              | No                   | No                    | 5-FU/FA, FOLFOX      |
| PT61         | dHGP       | Male          | 77                      | 2020                     | IV                          | Sigma                         | MSS              | No                   | No                    | No                   |

## Supplementary Table 3. Related to Figure 2

### Quality metrics spaRNASeq

| patient ID <sup>a</sup> | HGP <sup>b</sup> | number of reads <sup>c</sup> | number of spots under tissue <sup>d</sup> | UMIs/spot <sup>e</sup> | genes/spot <sup>f</sup> | saturation <sup>g</sup> | number of spots under tissue after exclusion | reason for exclusion <sup>h</sup> |
|-------------------------|------------------|------------------------------|-------------------------------------------|------------------------|-------------------------|-------------------------|----------------------------------------------|-----------------------------------|
| PT55                    | dHGP             | 191032701                    | 4924                                      | 5925                   | 2926                    | 77,7%                   | 4857                                         | 1                                 |
| PT68                    | dHGP             | 155654697                    | 4940                                      | 14008                  | 4042                    | 31,6%                   | 4226                                         | 1;2                               |
| PT61                    | dHGP             | 231767542                    | 3434                                      | 5141                   | 2630                    | 80,3%                   | 3434                                         | /                                 |
| PT36                    | rHGP             | 141418423                    | 3890                                      | 6768                   | 3334                    | 48,6%                   | 3890                                         | /                                 |
| PT44                    | rHGP             | 185134567                    | 2483                                      | 22948                  | 5583                    | 53,7%                   | 2843                                         | /                                 |
| PT54                    | rHGP             | 164424295                    | 2601                                      | 6043                   | 2838                    | 73,5%                   | 2554                                         | 3                                 |

Notes:

**a** the patient identifier of each sample

**b** specifies whether the sample was derived from desmoplastic or replacement CRCLM

**c** the total number of reads per sample

**d** the number of spots under tissue per sample (according to spaceranger count)

**e** the median number of UMIs detected per tissue covered spot prior to exclusion

**f** the median number of genes detected per tissue covered spot prior to exclusion

**g** sequencing saturation equals the fraction of reads originating from an already-observed UMI

**h** reasons for exclusion: 1:gene count below the threshold of 200 genes/spot; 2:ambiguous expression of canonical marker genes; 3:folded tissue on slide

## Supplementary Table 4. Related to Figure 2

### Uniquely upregulated genes of PT61 for each biologically annotated cluster (spaRNASeq)

| Rank | Cancer area | Hepatocyte area | Fibroblastic reaction | Necrotic area | Mainly T-cells within TU | Inner rim    |
|------|-------------|-----------------|-----------------------|---------------|--------------------------|--------------|
| 1    | PHGR1       | FGG             | PTGDS                 | SERF1A        | ATP5MC3                  | IGKC         |
| 2    | PRR15L      | ALB             | TPM2                  | SERF1B        | HLA-DPB1                 | IGHG1        |
| 3    | MAP7        | FGA             | PPP1R14A              | MTRNR2L12     | MIF                      | IGHG3        |
| 4    | ID4         | HP              | MYH11                 | FAM153B       | HNRNPD                   | IGHV3-30     |
| 5    | MACROD1     | TF              | TMEM119               | UPK3BL1       | HLA-DRA                  | IGHJ6        |
| 6    | HSPD1       | AHSG            | MOXD1                 | POLR2J3       | MUC6                     | LYZ          |
| 7    | PLA2G2A     | APOA1           | ELN                   | SPACA7        | TAP2                     | TIMP1        |
| 8    | DDR1        | RBP4            | APOBEC3F              | USP17L19      | TMSB4X                   | IGKV3OR2-268 |
| 9    | PA2G4       | HPX             | FEZ1                  | TAF11L3       | PSMB9                    | IGKV1D-12    |
| 10   | NOP53       | CLU             | IGHV1-46              | USP17L23      | HLA-DPA1                 | COL1A2       |
| 11   | HNRNPA3     | APOC3           | GLT8D2                | USP17L8       | MAPKAPK2                 | C1QC         |
| 12   | EBPL        | VTN             | ESR2                  | TAF11L2       | NDUFA11                  | IGLC2        |
| 13   | CCT7        | CRP             | C1QTNF7               | MYO16         | TSPO                     | SPARC        |
| 14   | WNK4        | FGB             | STMN2                 | CA9           | NAPRT                    | TYROBP       |
| 15   | DDT         | C3              | NUAK1                 | USP17L5       | COTL1                    | LAPTM5       |
| 16   | EPCAM       | MT1X            | PPP1R3F               | POTEH         | TONSL                    | IFI6         |
| 17   | ASCL2       | GOS2            | SLC2A5                | USP17L18      | SOX9                     | IGHV3-35     |
| 18   | EPHB2       | HRG             | GPBAR1                | USP17L15      | IFITM3                   | FN1          |
| 19   | BSPRY       | CYP2E1          | CD1E                  | USP17L3       | RHPN1                    | IGFBP5       |
| 20   | SFN         | C1R             | IGHD                  | TAF11L6       | SSR1                     | FLNA         |
| 21   | KCNQ1       | C4A             | CPT1C                 | FAM72A        | CYBA                     | COL3A1       |
| 22   | MCM7        | ITIH2           | SUSD5                 | TAF11L9       | NDUFA3                   | IGFBP7       |
| 23   | AXIN2       | A1BG            | PPOX                  | SPDYE5        | UBE2S                    | TYMP         |
| 24   | SAPCD2      | APOB            | VPS50                 | GOLGA8N       | UQCR11                   | COL1A1       |
| 25   | TSPAN8      | AZGP1           | VXN                   | CBWD5         | TAF15                    | IGHV3OR16-13 |
| 26   | PRR13       | TTR             | FGF13                 | NBPF12        | SNRPC                    | IGHG2        |
| 27   | MAPK13      | POR             | KCNT2                 | TAF11L13      | INTS1                    | COL4A1       |
| 28   | TUBA4A      | APOA2           | TAFA4                 | USP17L13      | INO80B                   | VIM          |
| 29   | DNAJB1      | SERPINA1        | DACT3                 | ANKRD20A1     | SNRPD3                   | ITGB2        |
| 30   | HSPE1       | FABP1           | CASD1                 | USP17L10      | SNRPF                    | F2R          |
| 31   | REPIN1      | CYP4A11         | ZNF773                | ZNF706        | PAPOLA                   | CTSB         |
| 32   | CAMK2N1     | ORM1            | HORMAD1               | USP17L1       | INCENP                   | C1QB         |
| 33   | CDC42EP5    | ALDOB           | MYL4                  | POTEG         | MLLT6                    | CAVIN1       |
| 34   | EPHB4       | MT2A            | LRAT                  | IFNA4         | GPAA1                    | PSAP         |
| 35   | CDK4        | ASGR1           | FGF8                  | TAF11L8       | NDUFS8                   | S100A4       |
| 36   | BRI3BP      | RASD1           | SMUG1                 | PPIAL4D       | HNRNPA2B1                | IGKV4-1      |
| 37   | CYP2S1      | TFR2            | PCDHB5                | NDRG1         | DYNLL2                   | CCN2         |
| 38   | PRRC2A      | FBP1            | VSIG2                 | BAALC         | ZGPAT                    | EMILIN1      |
| 39   | PLEKHG5     | IGFBP1          | CCR4                  | LIG4          | ZMIZ2                    | IGLC3        |
| 40   | EIF6        | HPD             | ZNF594                | CBWD6         | EPPK1                    | LSP1         |
| 41   | HES1        | CFB             | PODN                  | GOLGA8F       | ARHGEF1                  | CTSD         |
| 42   | MLEC        | HMGCS2          | IFNL1                 | TRIM64B       | HSD17B10                 | CTSZ         |
| 43   | HSP90AA1    | APOE            | DIRAS3                | AGAP9         | SLC52A2                  | CAPG         |
| 44   | DNPH1       | CYP3A5          | SOX15                 | FSBP          | PDAP1                    | CCL18        |
| 45   | DACH1       | ADH4            | ANKEF1                | AMY2B         | TMEM160                  | GSN          |
| 46   | ERGIC3      | APOC1           | ZNF223                | ABHD13        | RUVBL2                   | C11orf96     |
| 47   | SNHG32      | GOLPH3          | UCP3                  | FAM72D        | MUC5AC                   | IGFBP4       |
| 48   | TAF10       | APOC2           | TMEM132E              | TCEA1         | IFI27                    | HTRA3        |
| 49   | RAB25       | FGF21           | C14orf28              | SNRPG         | MYBL2                    | CD74         |
| 50   | IMPDH2      | DCN             | OPRL1                 | SYNE1         | SF3B5                    | CTSC         |



## Supplementary Table 5. Related to Figure S2

### Uniquely upregulated genes of PT68 for each biologically annotated cluster (spaRNASeq)

| Rank | Hepatocyte area | CAFs/Macro phages (in Cancer area) | T- /B-cell infiltration( in hepatic area) | Inner rim | Necrotic area | Cancer area |
|------|-----------------|------------------------------------|-------------------------------------------|-----------|---------------|-------------|
| 1    | APOC3           | SULF1                              | SAA2                                      | UBD       | SERF1A        | PHGR1       |
| 2    | ALB             | COL1A1                             | CRP                                       | TNC       | SERF1B        | OLFM4       |
| 3    | TF              | MMP9                               | SAA1                                      | CDKN2A    | USP17L5       | EPCAM       |
| 4    | TTR             | MMP11                              | C3                                        | TAP1      | USP17L19      | LGALS4      |
| 5    | AHSG            | VIM                                | FGA                                       | CYCS      | TAS2R20       | CEACAM5     |
| 6    | HRG             | SPP1                               | MT2A                                      | TGM2      | MYOZ1         | ELF3        |
| 7    | ADH4            | AEBP1                              | LBP                                       | S100A14   | OR4F21        | KLF5        |
| 8    | APOA1           | COL1A2                             | GOS2                                      | RAN       | TAF11L3       | CDH17       |
| 9    | CYP2E1          | CTSB                               | IL32                                      | RNF213    | IGF2BP3       | SPINT2      |
| 10   | APOA2           | POSTN                              | SERPINA3                                  | TAP2      | PFDN4         | NOP53       |
| 11   | RBP4            | ACTA2                              | SERPINA1                                  | ARGLU1    | EPYC          | PPA1        |
| 12   | CLU             | TAGLN                              | CFB                                       | RAB5IF    | C17orf107     | CLDN3       |
| 13   | ASS1            | MFGE8                              | C4B                                       | EPSTI1    | TAF11L2       | TFF3        |
| 14   | ALDOB           | LAPTM5                             | DCN                                       | ARPC1B    | C19orf85      | CD9         |
| 15   | AMBP            | CTSD                               | MT1M                                      | EIF5A     | RXFP2         | S100A10     |
| 16   | ADH1B           | CCN2                               | C1R                                       | BCL2L1    | OR4F4         | PPP1R1B     |
| 17   | CYP2A6          | LUM                                | LTB                                       | ILF3      | SLC5A7        | CLDN7       |
| 18   | APOC1           | FLNA                               | MT1B                                      | TRIM31    | OR2AK2        | GOLM1       |
| 19   | HP              | IGFBP5                             | CORO1A                                    | HDGF      | USP29         | PLCB4       |
| 20   | FGG             | CST1                               | CXCL12                                    | CLTB      | OR4K15        | HMGN1       |
| 21   | GC              | SPARC                              | NNMT                                      | NFKB2     | PRAMEF17      | LSR         |
| 22   | GSTA1           | PLAUR                              | MT1X                                      | OAS3      | KLRF2         | FKBP4       |
| 23   | AZGP1           | LYZ                                | SPON2                                     | PLSCR1    | SNAP91        | YWHAZ       |
| 24   | CYP2A7          | INHBA                              | FGL1                                      | ACTG1     | MB            | KRT8        |
| 25   | VTN             | COL4A1                             | ITIH3                                     | CDK6      | OR4K13        | LSM7        |
| 26   | ITIH2           | COL3A1                             | LRG1                                      | COTL1     | RAD21L1       | HMGB2       |
| 27   | APOB            | GSN                                | PLA2G2A                                   | GATAD2A   | DGKZ          | MCM7        |
| 28   | APOC4           | COL6A3                             | C1S                                       | TAGLN2    | MPP4          | PRSS8       |
| 29   | FGB             | GREM1                              | MT1E                                      | ARPC2     | GLP1R         | CLIC1       |
| 30   | KNG1            | GPNMB                              | SOD2                                      | EIF4A1    | USP17L15      | UBE2C       |
| 31   | MAT1A           | CD68                               | CNDP2                                     | SRRT      | OR2T27        | SH3BGRL2    |
| 32   | CYP4A11         | SOD3                               | GLUL                                      | JPT1      | LRRD1         | TPI1        |
| 33   | APOH            | VCAN                               | SLC39A14                                  | CENPW     | CEACAM21      | HSP90AA1    |
| 34   | ORM2            | CAPG                               | TNXB                                      | HNRNPUL1  | MS4A13        | HSPA1B      |
| 35   | HPD             | MMP14                              | HLA-DMA                                   | LAMC2     | ANKRD20A1     | CDH1        |
| 36   | HPX             | THBS2                              | COL6A1                                    | FLII      | SPDYE5        | PLEKHG6     |
| 37   | AFM             | IGFBP7                             | NFIC                                      | CDC37     | FAM163A       | TSPAN8      |
| 38   | CYP2B6          | TPM2                               | GOLPH3                                    | LMO7      | FCRL2         | FAM3D       |
| 39   | AGT             | HLA-B                              | SEPTIN1                                   | HLA-C     | USP17L18      | CHMP4B      |
| 40   | CYP2C8          | FN1                                | IKZF1                                     | UBE2M     | UBQLNL        | MDH2        |
| 41   | F2              | MMP12                              | PTGDS                                     | NME1      | CASQ1         | EIF6        |
| 42   | TTC36           | TIMP3                              | STOM                                      | HNRNPM    | TAS1R2        | MIF         |
| 43   | A1BG            | PSAP                               | BST2                                      | PTGES3    | TSSK3         | SDC4        |
| 44   | HAMP            | CD74                               | TNFSF14                                   | GTF3C6    | HPGDS         | RPIA        |
| 45   | PLG             | RNASE1                             | CIITA                                     | CDC25B    | GPR18         | SLC25A6     |
| 46   | ITIH1           | IFI6                               | KLHL5                                     | DDX21     | LYZL6         | PSMA7       |
| 47   | ADH1A           | NUPR1                              | TRBC1                                     | VASH1     | LRRC66        | TPX2        |
| 48   | PCK1            | B2M                                | PHYKPL                                    | NUTF2     | CASP5         | PFKFB2      |
| 49   | CPS1            | PMEPA1                             | APOL1                                     | SNRPD1    | SPAM1         | LDHB        |
| 50   | SLC27A5         | HLA-DRA                            | SKAP1                                     | RASSF4    | CLRN2         | SRSF3       |

## Supplementary Table 6. Related to Figure S2

### Uniquely upregulated genes of PT55 for each biologically annotated cluster (spaRNASeq)

| Rank | Hepatocyte area | Cancer area | Necrotic area | Fibrosis + Infiltration |
|------|-----------------|-------------|---------------|-------------------------|
| 1    | CLU             | PIGR        | SERF1A        | IGHJ6                   |
| 2    | A1BG            | PPP1R1B     | SERF1B        | IGKC                    |
| 3    | FGB             | SCRIB       | MTRNR2L12     | IGHV3-30                |
| 4    | VTN             | TSPAN8      | USP17L19      | COL1A2                  |
| 5    | CFB             | CDHR1       | USP17L18      | COL3A1                  |
| 6    | TF              | MUC2        | TAF11L2       | IGHV3-35                |
| 7    | CYP2E1          | DDR1        | USP17L3       | IGLC2                   |
| 8    | RBP4            | COX6C       | USP17L8       | TPM2                    |
| 9    | HP              | CKB         | USP17L5       | IGHV3OR16-13            |
| 10   | AHSG            | FAM3D       | TAF11L8       | COL1A1                  |
| 11   | MT1G            | PHGR1       | TAF11L9       | TIMP1                   |
| 12   | CRP             | CLDN7       | CT45A10       | AKR1B1                  |
| 13   | C3              | EPHB3       | POLR2J3       | SPARC                   |
| 14   | ALB             | CEACAM5     | TAF11L3       | IGFBP7                  |
| 15   | SAA2            | AMN         | RNF19B        | LAPTM5                  |
| 16   | HPX             | HSF4        | RNASEL        | PDGFRB                  |
| 17   | SERPINA1        | CYP2S1      | USP17L15      | CIITA                   |
| 18   | FGA             | SPNS2       | SLC66A3       | FLNA                    |
| 19   | APOA1           | CEP170B     | TAF11L13      | PLXND1                  |
| 20   | ITIH2           | MYH14       | KCNK6         | FBN1                    |
| 21   | FGG             | CCDC183     | RNF20         | HLA-DOA                 |
| 22   | IGFBP1          | SPINT2      | ZNF527        | IGHG1                   |
| 23   | C4A             | ITM2C       | MAPK6         | SCX                     |
| 24   | ORM1            | MAPK13      | OR11H1        | COL4A1                  |
| 25   | APOC3           | MAPKAPK5    | SLC25A32      | RNF213                  |
| 26   | HRG             | MUC5B       | USP17L4       | PCOLCE                  |
| 27   | C1R             | ITGB4       | NANOGP8       | ARGLU1                  |
| 28   | MT2A            | FXD3        | QSER1         | CORO1A                  |
| 29   | SAA1            | FAM83H      | ZNF280D       | HLA-DMA                 |
| 30   | MT1X            | IER2        | POLR2J2       | TYROBP                  |
| 31   | ORM2            | PTK6        | GOLGA6C       | ARHGEF2                 |
| 32   | G0S2            | AIFM3       | USP17L23      | NOTCH3                  |
| 33   | C4B             | WNK4        | IFNA4         | MMP14                   |
| 34   | APOB            | MYO7B       | PKP1          | CREBZF                  |
| 35   | AMBP            | CLDN4       | ARID3B        | PDLIM3                  |
| 36   | APOC2           | TCF25       | TTC26         | SMCHD1                  |
| 37   | HPD             | COX5A       | SPATA31A5     | LPCAT1                  |
| 38   | C1S             | PRSS8       | DRP2          | LTB                     |
| 39   | MAT1A           | HSF1        | SHLD3         | PTGDS                   |
| 40   | ADH1B           | EPCAM       | INPP4B        | PLEKHG2                 |
| 41   | LBP             | BAIAP2L2    | CCER2         | F2R                     |
| 42   | ITIH3           | SLC25A39    | OR11H2        | IGHV3-33                |
| 43   | SERPINA3        | FOXP4       | TMED3         | TNS4                    |
| 44   | CFH             | CRACR2B     | FHOD3         | C1QC                    |
| 45   | MT1B            | SREBF1      | ZNF85         | NES                     |
| 46   | APOC4           | TFF3        | ZNF786        | CENPT                   |
| 47   | SLC39A14        | PTPRF       | DHFR2         | ACTA2                   |
| 48   | ALDOB           | TLE2        | IQCH          | COL6A3                  |
| 49   | KNG1            | S100A14     | DDX11         | ITPR3                   |
| 50   | SOD2            | HES6        | MAP3K1        | SMTN                    |

## Supplementary Table 7. Related to Figure S2

### Uniquely upregulated genes of PT36 for each biologically annotated cluster (spaRNASeq)

| Rank | Cancer area | Hepatocyte area | CAFs in cancer area |
|------|-------------|-----------------|---------------------|
| 1    | ALDH1B1     | SAA2            | LCN2                |
| 2    | EPHB3       | SAA1            | PMEPA1              |
| 3    | SELENBP1    | FGG             | QSOX1               |
| 4    | POLR1D      | HP              | HLA-G               |
| 5    | TRABD2A     | CRP             | RNASE1              |
| 6    | SFN         | ORM1            | MDK                 |
| 7    | MAOA        | FGA             | GPRC5A              |
| 8    | LGALS4      | FGB             | SPP1                |
| 9    | HMGB2       | C3              | SEC61G              |
| 10   | MAPK3       | ALB             | NKD1                |
| 11   | PHGR1       | VTN             | LAMP1               |
| 12   | PPP1R1B     | CYP2E1          | SOD3                |
| 13   | CDX1        | MT2A            | AEBP1               |
| 14   | MAPK13      | HPX             | NPC2                |
| 15   | HSD11B2     | APOA1           | CEL                 |
| 16   | RB1         | SERPINA1        | MFGE8               |
| 17   | FXYD3       | APOC3           | INAVA               |
| 18   | TRPM4       | RBP4            | CAPG                |
| 19   | NDUFB2      | APOE            | MTRNR2L12           |
| 20   | HNRNPL      | APOA2           | KDEL2               |
| 21   | PDHA1       | CLU             | SPARC               |
| 22   | HNRNPD      | TF              | FLNA                |
| 23   | SLC26A3     | APOB            | IGFBP5              |
| 24   | SLC25A5     | APOC1           | TMED10              |
| 25   | S100P       | AHSG            | BEX3                |
| 26   | ATP5F1C     | AMBP            | TGFBI               |
| 27   | PRDX5       | C4B             | CHPF                |
| 28   | MARCKSL1    | C4A             | EGLN3               |
| 29   | VIL1        | ORM2            | TXNIP               |
| 30   | TMEM54      | C1R             | POSTN               |
| 31   | LGALS3      | A1BG            | CREB3               |
| 32   | UBE2C       | PLA2G2A         | COL6A3              |
| 33   | ZFP36L2     | ADH1B           | ARHGEF1             |
| 34   | HSD17B10    | MT1E            | TIMP1               |
| 35   | MCM7        | GC              | IFI6                |
| 36   | ATP5MC3     | MT1G            | ACTA2               |
| 37   | MUC12       | AGT             | EMILIN1             |
| 38   | ARPC1A      | SERPINA3        | COL3A1              |
| 39   | COX5A       | CFB             | TXNDC5              |
| 40   | SYAP1       | ITIH4           | VIM                 |
| 41   | NBL1        | LBP             | DBNL                |
| 42   | PTGFRN      | ALDOB           | TAGLN               |
| 43   | SLC12A2     | ITIH3           | ELOVL5              |
| 44   | MPP1        | ASGR1           | MELTF               |
| 45   | COX4I1      | CP              | TIMP3               |
| 46   | ITM2C       | ATF5            | CALU                |
| 47   | PRELID3B    | C1S             | TBL2                |
| 48   | CDX2        | HRG             | CD46                |
| 49   | PFKL        | ITIH2           | KLK10               |
| 50   | CACYBP      | HAMP            | DHRS7               |

## Supplementary Table 8. Related to Figure S2

### Uniquely upregulated genes of PT44 for each biologically annotated cluster (spaRNASeq)

| Rank | Hepatocyte area | Cancer area | Area of hepatic artery with lymphatic infiltration | Hepatic triads |
|------|-----------------|-------------|----------------------------------------------------|----------------|
| 1    | GSTA1           | CLDN4       | IGKC                                               | AQP1           |
| 2    | ADH4            | S100A6      | PTGDS                                              | KRT7           |
| 3    | TTR             | CLDN7       | IGHG1                                              | SFRP5          |
| 4    | BAAT            | GSTP1       | IGHV3-30                                           | CXCL6          |
| 5    | HMGCS2          | EPCAM       | IGHA1                                              | MUC6           |
| 6    | CPS1            | HMGA1       | IGKV1D-12                                          | DCDC2          |
| 7    | HGD             | CLDN3       | IGLC1                                              | ANXA4          |
| 8    | BHMT            | CDC42EP5    | IGHV3-35                                           | FXYD2          |
| 9    | APOC3           | SLC25A6     | IGHM                                               | NPW            |
| 10   | ALDOB           | TSPAN8      | IGLC2                                              | CHST4          |
| 11   | TF              | LYZ         | IGKV3OR2-268                                       | FGFR3          |
| 12   | TAT             | MYH14       | JCHAIN                                             | DEFB1          |
| 13   | ADH1B           | GPRC5A      | IGFBP7                                             | CITED4         |
| 14   | CYP2A6          | CDX1        | COL3A1                                             | CRIP2          |
| 15   | GADD45G         | S100A10     | C7                                                 | ERICH5         |
| 16   | ADH1A           | CXCL5       | CCN2                                               | CYP3A7         |
| 17   | MAT1A           | SPINT2      | COL1A2                                             | HOMER2         |
| 18   | AQP9            | CEACAM5     | IGLC3                                              | PKHD1          |
| 19   | ALDH1L1         | RAB25       | CCN1                                               | CLDN1          |
| 20   | DCXR            | IER3        | DEPP1                                              | FOSB           |
| 21   | CYP2B6          | DDR1        | AEBP1                                              | AGRN           |
| 22   | TTC36           | NQO1        | COL1A1                                             | SLC4A4         |
| 23   | CYP1A2          | S100A14     | ACTA2                                              | FGFR2          |
| 24   | APOA2           | C19orf33    | CD74                                               | AHNAK          |
| 25   | ACSL1           | ITPR3       | SPARC                                              | ZBTB16         |
| 26   | SULT2A1         | CYP2S1      | TAGLN                                              | SORBS2         |
| 27   | APOC4           | ELF3        | HLA-DRB1                                           | TACC1          |
| 28   | APOH            | CCND2       | HLA-DRA                                            | SPP1           |
| 29   | APOC1           | RNF43       | IGKV4-1                                            | CFTR           |
| 30   | CYP2C8          | PLCB3       | DPT                                                | HNF1B          |
| 31   | CYP2C9          | MGAT4B      | SOD3                                               | SCD5           |
| 32   | CYP2A7          | CFL1        | IGHV3-11                                           | ANPEP          |
| 33   | CMBL            | FAM83H      | DCN                                                | NEDD9          |
| 34   | ALB             | PGGHG       | MFAP4                                              | LAMA2          |
| 35   | AOX1            | ARPC1B      | MYL9                                               | ARRDC2         |
| 36   | AZGP1           | EIF6        | CXCR4                                              | TACSTD2        |
| 37   | SELENOP         | HSPA1B      | EMILIN1                                            | UGT2B15        |
| 38   | DPYS            | TFF1        | FLNA                                               | SH3YL1         |
| 39   | CES1            | PIGR        | SERPINE1                                           | DTNA           |
| 40   | AHSG            | PPDPF       | BGN                                                | CCDC9B         |
| 41   | HPD             | PKP3        | CAVIN1                                             | BICC1          |
| 42   | SDS             | PHGR1       | IGHV3OR16-13                                       | MYADM          |
| 43   | HRG             | S100P       | MYH11                                              | OBSL1          |
| 44   | ANG             | PLEC        | FBN1                                               | CD59           |
| 45   | PCK1            | CLIC1       | HLA-DPB1                                           | CAV2           |
| 46   | KNG1            | MCM7        | IGHG4                                              | SERPINA5       |
| 47   | HSD17B6         | INF2        | NR4A1                                              | FSTL3          |
| 48   | AMBP            | AHCY        | C11orf96                                           | HES4           |
| 49   | SERPINC1        | IFI27       | HLA-DPA1                                           | CCL21          |
| 50   | ASS1            | SNRPD1      | COL6A2                                             | RASSF4         |

## Supplementary Table 9. related to Figure 2

### Uniquely upregulated genes of PT54 for each biologically annotated cluster (spaRNASeq)

| Rank | Hepatocyte |                |             |
|------|------------|----------------|-------------|
|      | area       | Invasion front | Cancer area |
| 1    | ALB        | COL1A2         | GOLM1       |
| 2    | FGG        | COL3A1         | GPA33       |
| 3    | CYP2A7     | COL4A1         | CKB         |
| 4    | MT1X       | SPARC          | SLC12A2     |
| 5    | TTR        | TPM2           | MIF         |
| 6    | FGA        | IER3           | KRT20       |
| 7    | TF         | MCM7           | SPINT2      |
| 8    | RBP4       | FLNA           | ALDOA       |
| 9    | APOE       | NES            | TFF3        |
| 10   | APOA1      | TP53I11        | CYP2S1      |
| 11   | APOC3      | TIMP1          | EPCAM       |
| 12   | HP         | AREG           | DDR1        |
| 13   | AHSG       | HES4           | PKM         |
| 14   | HRG        | LZTS3          | CLDN7       |
| 15   | CYP2E1     | TPM1           | CEACAM5     |
| 16   | HPX        | C7orf50        | PPP1R1B     |
| 17   | FGB        | EPHB4          | FXYP3       |
| 18   | C1R        | PLEKHG5        | CSTB        |
| 19   | CYP2B6     | CDC25B         | TM4SF1      |
| 20   | AZGP1      | NRARP          | CCDC183     |
| 21   | HPD        | CCN2           | EFHD2       |
| 22   | ITIH2      | CAVIN1         | ANXA4       |
| 23   | CLU        | REPIN1         | BCAP31      |
| 24   | MAT1A      | NR4A1          | CLDN3       |
| 25   | APOC1      | IGFBP7         | TSPAN8      |
| 26   | ADH4       | ILF3           | HSPH1       |
| 27   | MT2A       | FBN1           | GPRC5A      |
| 28   | APOB       | ACTA2          | FABP1       |
| 29   | C4A        | LTBP4          | TGFBI       |
| 30   | VTN        | PDGFA          | S100A10     |
| 31   | ALDOB      | SPIRE2         | PM2EP1      |
| 32   | APOA2      | MARCKS         | VEGFA       |
| 33   | AMBP       | TPX2           | DNAJB1      |
| 34   | MT1M       | PKN1           | ARID3A      |
| 35   | APOC4      | EXOSC6         | S100P       |
| 36   | CYP4A11    | CDK6           | LGALS4      |
| 37   | A1BG       | PLEKHG2        | BLCAP       |
| 38   | IGFBP1     | CDK4           | CD9         |
| 39   | C3         | ARGLU1         | HSPA1B      |
| 40   | MT1E       | SNX5           | HSP90AB1    |
| 41   | HAMP       | YBX3           | ATP1B1      |
| 42   | TFR2       | SMTN           | EGLN3       |
| 43   | ADH1B      | ACOT7          | NCBP2       |
| 44   | CYP2A6     | HNRNPUL1       | TFRC        |
| 45   | ALDH1L1    | CBX4           | PPDPF       |
| 46   | ACSL1      | ASCL2          | PLAUR       |
| 47   | MT1B       | GRK2           | SLC2A1      |
| 48   | ORM1       | TELO2          | CPNE1       |
| 49   | FBP1       | DMTN           | C19orf33    |
| 50   | CRP        | PDLIM3         | PRSS8       |

## Supplementary Table 10. Related to Figure 2

### Genes uniquely upregulated in rHGP and dHGP cancer and hepatocyte areas (spaRNASeq)

| Rank | rHGP-<br>Cancer area | rHGP-<br>Hepatocyte<br>area | dHGP-<br>Hepatocyte<br>area | dHGP-<br>Cancer area |
|------|----------------------|-----------------------------|-----------------------------|----------------------|
| 1    | CEACAM5              | ALB                         | FGG                         | DPEP1                |
| 2    | ACTB                 | APOC1                       | HRG                         | EPHB3                |
| 3    | SPINT2               | CYP2A7                      | IGKC                        | NUPR1                |
| 4    | EPCAM                | ALDOB                       | AHSG                        | TNS4                 |
| 5    | RRBP1                | SDS                         | TF                          | PPP1R16A             |
| 6    | PPDPF                | TAT                         | C4A                         | SCX                  |
| 7    | TMSB4X               | CYP2A6                      | G0S2                        | CCDC183              |
| 8    | GNB2                 | AMBP                        | ITIH2                       | MTRNR2L12            |
| 9    | ATP1A1               | TTR                         | CLU                         | FAM83H               |
| 10   | CST3                 | APOA2                       | C1R                         | HLA-A                |
| 11   | S100A10              | FOS                         | DCN                         | WNK4                 |
| 12   | FLNA                 | HP                          | CYP2E1                      | FKBP4                |
| 13   | EFHD2                | MT2A                        | CFB                         | ELF3                 |
| 14   | SLC25A6              | ERRFI1                      | MCF2L                       | TNFSF9               |
| 15   | CLDN3                | ORM1                        | ADH4                        | CDK6                 |
| 16   | CLDN4                | APOA1                       | CD74                        | CANT1                |
| 17   | PRSS8                | MT1E                        | IGHV3-30                    | IKBKB                |
| 18   | PMEPA1               | MAT1A                       | APOC3                       | AMN                  |
| 19   | GSTP1                | FOSB                        | APOC4                       | NRARP                |
| 20   | NQO1                 | CPS1                        | IGHJ6                       | CDHR1                |
| 21   | CD9                  | INSIG1                      | AZGP1                       | TAP1                 |
| 22   | SEC61G               | ACSL1                       | ALB                         | INF2                 |
| 23   | PRDX5                | DUSP1                       | A1BG                        | PGGHG                |
| 24   | HLA-C                | SELENOP                     | VTN                         | SCRIB                |
| 25   | BCAP31               | A2M                         | COL3A1                      | HLA-F                |
| 26   | KRT20                | PCK1                        | APOE                        | PRR15L               |
| 27   | SOD3                 | MT1X                        | ATP11A                      | AXIN2                |
| 28   | KDEL2                | APOH                        | AFM                         | SREBF1               |
| 29   | NBL1                 | RHOB                        | FGA                         | TLE2                 |
| 30   | CD151                | RBP4                        | C4B                         | PLEC                 |
| 31   | CLDN7                | C3                          | IGHV3-35                    | CPNE7                |
| 32   | PHGR1                | SERPINA1                    | UBD                         | VPS51                |
| 33   | SSR4                 | BHMT                        | FGF21                       | MYO7B                |
| 34   | NOX1                 | CYP2B6                      | CYP4A11                     | JPH1                 |
| 35   | FABP1                | AGT                         | C1S                         | GTF2IRD1             |
| 36   | ARPC1B               | FGB                         | FAM153B                     | FCGBP                |
| 37   | S100A6               | HAMP                        | LYZ                         | NPIP4                |
| 38   | TUBA1C               | GADD45G                     | ORM2                        | MIB2                 |
| 39   | GNAS                 | NNMT                        | TTC36                       | CRACR2A              |
| 40   | MARCKSL1             | EGR1                        | RASD1                       | MUC5B                |
| 41   | ADGRG1               | ITIH4                       | APOB                        | ILF3                 |
| 42   | PYGB                 | ZFAND5                      | C1QC                        | TRAF4                |
| 43   | SLC44A4              | HPX                         | NAXD                        | CBLC                 |
| 44   | TXN                  | IGFBP4                      | F12                         | FCGRT                |
| 45   | ATP9A                | TF                          | KNG1                        | MYC                  |
| 46   | PDIA4                | SAA1                        | SERPINE1                    | TELO2                |
| 47   | ATP5MF               | APOC3                       | HLA-DPB1                    | BOP1                 |
| 48   | AGPAT2               | GADD45B                     | IGHG3                       | JAG2                 |
| 49   | C19orf33             | FTL                         | MUC6                        | B4GALNT3             |

## Supplementary Table 11. Related to Figure 3

### Geneset of genes regulated by Lef1

Metabolism-associated genes downregulated upon induction of a dominant-negative isoform of Lef1 in DLD-1 colon cancer cells \*

| Gene Symbol | Gene Title                                                           |
|-------------|----------------------------------------------------------------------|
| ABAT        | 4-aminobutyrate aminotransferase, mitochondrial                      |
| ACAA2       | acetyl-Coenzyme A acyltransferase 2                                  |
| ADAMTS17    | A disintegrin and metalloproteinase with thrombospondin motifs 17    |
| ARID5B      | AT-rich interactive domain-containing protein 5B                     |
| CHI3L1      | Chitinase-3-like protein 1                                           |
| CLOCK       | Circadian locomotor output cycles protein kaput                      |
| CPA6        | Carboxypeptidase A6                                                  |
| DDC         | Aromatic-L-amino-acid decarboxylase                                  |
| DPYSL3      | Dihydropyrimidinase-related protein 3                                |
| EIF4G3      | Eukaryotic translation initiation factor 4 gamma 3                   |
| ELAVL2      | ELAV-like protein 2                                                  |
| ELF1        | ETS-related transcription factor Elf-1                               |
| HECW2       | E3 ubiquitin-protein ligase HECW2                                    |
| HOXD3       | Homeobox protein Hox-D3                                              |
| KIT         | Mast/stem cell growth factor receptor                                |
| JAG1        | Protein jagged-1                                                     |
| LCK         | Proto-oncogene tyrosine-protein kinase LCK                           |
| LIPG        | Endothelial lipase                                                   |
| MCCC2       | Methylcrotonoyl-CoA carboxylase beta chain, mitochondrial            |
| NFKBIZ      | NF-kappa-B inhibitor zeta                                            |
| NRP1        | Neuropilin-1                                                         |
| PAX6        | Paired box protein Pax-6                                             |
| PCBD1       | Pterin-4-alpha-carbinolamine dehydratase                             |
| PDK1        | [Pyruvate dehydrogenase [lipoamide]] kinase isozyme 1, mitochondrial |
| PTCH1       | Protein patched homolog 1                                            |
| RNASEH1     | Ribonuclease H1                                                      |
| ROR1        | Tyrosine-protein kinase transmembrane receptor ROR1                  |
| SLC35D1     | UDP-glucuronic acid/UDP-N-acetylgalactosamine transporter            |
| SLC35D3     | Solute carrier family 35 member D3                                   |
| SLC7A7      | Y+L amino acid transporter 1                                         |
| SORBS2      | Sorbin and SH3 domain-containing protein 2                           |
| SOX4        | Transcription factor SOX-4                                           |
| STK17B      | Serine/threonine-protein kinase 17B                                  |
| TCF4        | Transcription factor 4                                               |
| THAP2       | THAP domain-containing protein 2                                     |
| TLE4        | Transducin-like enhancer protein 4                                   |
| TUSC3       | Tumor suppressor candidate 3                                         |
| TXNDC13     | Thioredoxin domain-containing protein 13                             |
| UGT2B28     | UDP-glucuronosyltransferase 2B28                                     |

Note:

\* references: Pate, K.T., et al. *Wnt signaling directs a metabolic program of glycolysis and angiogenesis in colon cancer. EMBO J 33, 1454-1473 (2014).*

## Supplementary Table 12. Related to Figure 3

### Clinical Characteristics of 10 patients resected for CRCLM used for establishment of PDOs

| HGP  | Gender | Age at resection | Year of resection | Initial postop. UICC | Location primary tumor | MS status | KRAS mutation | RAS inhibition | Pre-treatment                                             |
|------|--------|------------------|-------------------|----------------------|------------------------|-----------|---------------|----------------|-----------------------------------------------------------|
| rHGP | Male   | 72               | 2020              | IV                   | Colon desc.            | MSS       | G12V          | No             | FOLFOX                                                    |
| rHGP | Male   | 54               | 2020              | III                  | Rectum                 | MSS       | No            | Candesartan    | FOLFOX                                                    |
| rHGP | Male   | 69               | 2021              | III                  | Sigma                  | MSS       | No            | No             | Oxaliplatin, Xeloda, FOLFIRI                              |
| rHGP | Female | 62               | 2021              | II                   | Sigma                  | MSS       | No            | Candesartan    | No                                                        |
| rHGP | Male   | 77               | 2021              | III                  | Sigma                  | MSS       | Q61R          | No             | No                                                        |
| dHGP | Male   | 44               | 2020              | IV                   | Colon asc.             | MSS       | No            | Ramipril       | FOLFOX, Cetuximab                                         |
| dHGP | Female | 67               | 2020              | IV                   | Rectum                 | MSS       | G12D          | Enalapril      | Oxaliplatin, Bevacizumab                                  |
| dHGP | Female | 67               | 2020              | IV                   | Rectum                 | MSS       | Gly12Val      | Candesartan    | No                                                        |
| dHGP | Male   | 63               | 2021              | III                  | Sigma                  | MSS       | No            | No             | No                                                        |
| dHGP | Male   | 66               | 2021              | IV                   | Sigma                  | MSS       | No            | No             | Capecitabin/Oxaliplatin;<br>Irinotecan/ 5-FU; Bevacizumab |

*Note: Initial postoperative UICC describes UICC at timepoint of resection of primary tumor;  
Neoadjuvant treatment: within 6 months prior to CRCLM resection*



### Supplementary Table 13. Related to Figure S3

#### Clinical Characteristics of 6 patients resected for CRCLM used for scRNASeq

| PT-ID | HGP  | Gender | Age at resection | Year of resection | Initial postop. UICC | Location primary tumor | MS status | KRAS mutation | RAS inhibition | Pre-treatment |
|-------|------|--------|------------------|-------------------|----------------------|------------------------|-----------|---------------|----------------|---------------|
| PT59  | rHGP | Male   | 63               | 2020              | IV                   | Rectum                 | MSS       | N/A           | Ramipril       | No            |
| PT44  | rHGP | Female | 69               | 2020              | III                  | Colon asc.             | MSS       | No            | No             | No            |
| PT54  | rHGP | Female | 53               | 2020              | IV                   | Rectum                 | MSS       | No            | No             | FOLFOX        |
| PT55  | dHGP | Female | 67               | 2020              | IV                   | Rectum                 | MSS       | Gly12Val      | Candesartan    | No            |
| PT52  | dHGP | Male   | 71               | 2020              | IV                   | Rectum                 | MSS       | N/A           | No             | No            |
| PT61  | dHGP | Male   | 77               | 2020              | IV                   | Sigma                  | MSS       | No            | No             | No            |

*Note: Initial postoperative UICC describes UICC at timepoint of resection of primary tumor;  
Neoadjuvant treatment: within 6 months prior to CRCLM resection*

## Supplementary Table 14. Related to Figure S3

### Quality metrics scRNAseq, before manual quality control

| patient ID | sample type    | number of reads | number of UMIs | number of events | mean UMI/event | median UMIs/event | mean genes/event | median genes/event | saturation |
|------------|----------------|-----------------|----------------|------------------|----------------|-------------------|------------------|--------------------|------------|
| PT-44      | tumor          | 354891250       | 20825636       | 10212            | 2039           | 181               | 411              | 104                | 84.0%      |
| PT-44      | adjunct normal | 293845852       | 22644503       | 10219            | 2216           | 862               | 581              | 151                | 66.5%      |
| PT-52      | tumor          | 334917162       | 2151754        | 11434            | 188            | 16                | 50               | 14                 | 98.1%      |
| PT-52      | adjunct normal | 353380327       | 18280261       | 10209            | 1791           | 146               | 501              | 77                 | 79.3%      |
| PT-54      | tumor          | 334728887       | 28872502       | 10167            | 2840           | 434               | 584              | 238                | 78.0%      |
| PT-54      | adjunct normal | 350565232       | 16112478       | 10132            | 1590           | 568               | 559              | 228                | 78.2%      |
| PT-55      | tumor          | 241408127       | 674431         | 4485             | 150            | 15                | 63               | 12                 | 98.8%      |
| PT-55      | adjunct normal | 346822637       | 16116260       | 10088            | 1598           | 476               | 491              | 110                | 77.7%      |
| PT-59      | tumor          | 319404388       | 1215084        | 12440            | 98             | 18                | 22               | 13                 | 98.9%      |
| PT-59      | adjunct normal | 397074211       | 15422141       | 10363            | 1488           | 529               | 428              | 98                 | 84.4%      |
| PT-61      | tumor          | 319566831       | 23889302       | 10176            | 2348           | 336               | 399              | 150                | 76.5%      |
| PT-61      | adjunct normal | 398639591       | 21069016       | 10324            | 2041           | 196               | 580              | 104                | 80.6%      |

### Quality metrics scRNAseq, after manual quality control

| patient ID | sample type    | number of UMIs | number of cells | mean UMI/cell | median UMI/cells | mean genes/cell | median genes/cell |
|------------|----------------|----------------|-----------------|---------------|------------------|-----------------|-------------------|
| PT-44      | tumor          | 12110141       | 1026            | 11803         | 8452             | 2699            | 2587              |
| PT-44      | adjunct normal | 14350664       | 2612            | 5494          | 3931             | 1709            | 1533              |
| PT-52      | tumor          | 1596960        | 132             | 12098         | 7563             | 2324            | 2268              |
| PT-52      | adjunct normal | 14418727       | 1550            | 9302          | 7253             | 2552            | 2555              |
| PT-54      | tumor          | 15801778       | 7257            | 2177          | 446              | 581             | 255               |
| PT-54      | adjunct normal | 11628103       | 2725            | 4267          | 2413             | 1468            | 1039              |
| PT-55      | tumor          | 15862          | 12              | 1322          | 716              | 539             | 359               |
| PT-55      | adjunct normal | 11425470       | 1741            | 6563          | 5059             | 2052            | 1960              |
| PT-59      | tumor          | 257197         | 33              | 7794          | 1640             | 1458            | 458               |
| PT-59      | adjunct normal | 9516955        | 1425            | 6679          | 5402             | 2152            | 2104              |
| PT-61      | tumor          | 10172530       | 2133            | 4769          | 1074             | 1113            | 372               |
| PT-61      | adjunct normal | 17341521       | 1773            | 9781          | 6878             | 2632            | 2469              |

## Supplementary Table 15. Related to Figure S3

### Uniquely upregulated marker genes of main clusters (scRNAseq)

| Rank | Granulocytes | Cholangiocytes | Cancer Cells | Fibroblasts | T-Cells  | B-Cells    | Endothelial Cells | Hepatocytes | NK-Cells | Plasma Cells |
|------|--------------|----------------|--------------|-------------|----------|------------|-------------------|-------------|----------|--------------|
| 1    | LYZ          | ANXA4          | FABP1        | IGFBP7      | CCL5     | MS4A1      | AKAP12            | ALB         | KLRD1    | IGKC         |
| 2    | HLA-DRA      | SPP1           | S100A6       | TAGLN       | IL32     | BANK1      | CCL14             | APOA1       | NGK7     | IGHG1        |
| 3    | CD74         | TM4SF4         | RPL39        | CALD1       | CD2      | RALGPS2    | LIFR              | TF          | GNLY     | JCHAIN       |
| 4    | HLA-DRB1     | KRT18          | RPS21        | RGSS        | CD69     | IGHM       | PTPRB             | FGB         | PTPRC    | MZB1         |
| 5    | CST3         | KRT8           | RPS18        | ACTA2       | BCL11B   | CD37       | DNASE1L3          | APOB        | CD247    | IGHA1        |
| 6    | CTSS         | DCDC2          | RPL36A       | SPARC       | IL7R     | BCL11A     | FCN3              | HP          | CCL4     | IGLC2        |
| 7    | SAT1         | DST            | PHGR1        | C11orf96    | BTG1     | HLA-DQA1   | CRHBP             | FGA         | PRF1     | HERPUD1      |
| 8    | IFI30        | AFDN           | RPL37        | SPARCL1     | CD3D     | AFF3       | FLT1              | APOA2       | TXK      | IGHG3        |
| 9    | HLA-DPA1     | BICC1          | TFF3         | MYL9        | CXCR4    | SMCHD1     | CAVIN2            | APOC3       | KLRK1    | TXNDC5       |
| 10   | HLA-DPB1     | SERPINA3       | RPS19        | TPM2        | TRAC     | CD83       | IL6ST             | APOC1       | ATM      | HSP90B1      |
| 11   | FGL2         | PKHD1          | RPL36        | BGN         | S100A4   | BIRC3      | PPFIBP1           | APOH        | KLRF1    | IGLC3        |
| 12   | SRGN         | KRT7           | RPS6         | VIM         | HLA-A    | CD79A      | TIMP3             | APOE        | PYHIN1   | SSRA         |
| 13   | AIF1         | SORBS2         | RPL12        | COL3A1      | CD3G     | LTB        | EPAS1             | FGG         | IL2RB    | TENT5C       |
| 14   | PSAP         | ONECUT1        | RPL13        | IGFBP5      | B2M      | FCRL1      | MAF               | RBP4        | GZMA     | XBP1         |
| 15   | FTH1         | SOX4           | FXYD3        | MYH11       | ZFP36L2  | PRDM2      | LDB2              | TTR         | RNF213   | BTG2         |
| 16   | TYROBP       | DEFB1          | RPS12        | TPM1        | HLA-B    | NIBAN3     | TCF4              | AMBIP       | MYBL1    | FCRL5        |
| 17   | COTL1        | DSP            | EPCAM        | COL1A2      | RPS29    | LY9        | ADGRF5            | SERPINA1    | KLRB1    | IGLC1        |
| 18   | FTL          | CLDN1          | RPL37A       | COL1A1      | CD3E     | CIITA      | CD36              | ORM1        | FYN      | TP53INP1     |
| 19   | HLA-DQB1     | ANXA2          | RPS4X        | TIMP1       | FYB1     | RIPOR2     | INSR              | CP          | CD7      | ANKRD28      |
| 20   | VCAN         | SNHG14         | RPL21        | MGP         | TRBC2    | STX7       | KDR               | ALDOB       | TXNIP    | PK11         |
| 21   | NAMPT        | SLC4A4         | GAPDH        | MT2A        | HLA-C    | SP100      | CTSL              | VTN         | CEP78    | RAB30        |
| 22   | S100A9       | ABCC3          | RPL13A       | ADAMTS1     | HCST     | MEF2C      | F8                | PCK1        | AKNA     | POU2AF1      |
| 23   | ACTB         | CD24           | RPL35        | PDGFRB      | RPS27    | CD55       | SPTBN1            | APOC2       | GZMB     | IGHGP        |
| 24   | RGS2         | VEGFA          | CEACAM5      | DSTN        | GZMK     | ADAM28     | PLPP3             | C3          | PLAC8    | FKBP11       |
| 25   | MNDA         | FXYD2          | RPL29        | LGALS1      | RPS3     | POU2F2     | HSPG2             | CLU         | ARL4C    | CREB3L2      |
| 26   | FCER1G       | SPATS2L        | RPL30        | MAP1B       | TMSB4X   | REL        | TFPI              | CPS1        | SAMD3    | DERL3        |
| 27   | NEAT1        | VMP1           | RPL26        | ID4         | HLA-E    | TTN        | TACC1             | AHSG        | IKZF3    | ITM2C        |
| 28   | LST1         | AGT            | RPLP1        | CRISPLD2    | CD8A     | PAX5       | STAB1             | CYP3A5      | MCTP2    | SEL1L        |
| 29   | PTPRE        | FGFR2          | RPL10        | ADIRF       | RPS27A   | TNFRSF13C  | NRP1              | PLG         | JAK1     | FBXW7        |
| 30   | SOD2         | SOX9           | LGALS4       | COL4A2      | SRSF7    | PRKCB      | BTNL9             | TAT         | UTRN     | IGHG2        |
| 31   | CLEC7A       | ATP1B1         | RPL18A       | ITGB1       | CLEC2D   | CD22       | IFI27             | CFH         | CCL3     | CPEB4        |
| 32   | SAMHD1       | ATP1A1         | TXN          | COL4A1      | RPS26    | LINC02397  | SEC14L1           | KNG1        | SPON2    | SEC11C       |
| 33   | FCN1         | HOMER2         | RPL32        | CARMN       | RPL41    | FCMR       | ARHGAP29          | GC          | MBP      | SEL1L3       |
| 34   | CYBB         | FARP1          | RPL7A        | NOTCH3      | STK17B   | IRF8       | MRC1              | ADH1B       | CST7     | FNDC3B       |
| 35   | TYMP         | ZBTB20         | RPS2         | COL6A2      | PIK3R1   | LINC00926  | RAPGEF5           | FN1         | ETS1     | IGHG4        |
| 36   | CCDC88A      | PMEPA1         | RPL28        | PALLD       | PARP8    | RCS1       | NR2F1             | MT-ND2      | STK4     | SPCS3        |
| 37   | LAPTM5       | ELF3           | LGALS3       | MYLK        | RPL17    | SWAP70     | SLC9A3R2          | MT-ND4L     | CELF2    | JUN          |
| 38   | CPVL         | SERPING1       | RPLP0        | SOD3        | DUSP2    | ITPR1      | GNG11             | CYP3A4      | SYTL3    | SLAMF7       |
| 39   | PLAUR        | ONECUT2        | RPS15        | COL6A1      | CDC42SE2 | P2RX5      | APP               | CYP2C9      | SLFN5    | FNDC3A       |
| 40   | S100A8       | AKR1C1         | RPS24        | IFITM3      | RPL23A   | MIR29B2CHG | HIPK2             | A1BG        | RUNX3    | SELENOS      |
| 41   | S100A11      | TNFRSF12A      | RPS16        | NR2F2       | CD48     | CD79B      | NOTCH4            | ORM2        | PLEK     | SPCS2        |
| 42   | FOS          | XIST           | EEF1A1       | MFGE8       | IFNG     | FCRL2      | LIMCH1            | CYP2E1      | MBNL1    | UBC          |
| 43   | LCP1         | ITIH5          | RPS28        | DCN         | CD52     | IGHD       | TCIM              | AZGP1       | FGFBP2   | ELL2         |
| 44   | ZEB2         | KCNQ1OT1       | RPL7         | SYNPO2      | PPP2R5C  | ARHGAP24   | EFNB2             | HPX         | IRF1     | PIM2         |
| 45   | CTSB         | PAWR           | RPS11        | ID3         | CALM1    | MYCBP2     | HECW2             | HRG         | RORA     | HSPA5        |
| 46   | MS4A7        | SLC12A2        | RPL35A       | JAG1        | TNFAIP3  | ARID1B     | MEG3              | SELENOP     | PRKCH    | HDLBP        |
| 47   | C1orf162     | LINC02532      | TPT1         | LHFPL6      | ARHGDI8  | PARP14     | WWTR1             | C1S         | AAK1     | SEC61B       |
| 48   | MPEG1        | CPM            | CKB          | TBX2        | RESF1    | SMAP2      | MACF1             | SERPINC1    | FCGR3A   | OGT          |
| 49   | HLA-DRB5     | CLDN10         | KRT19        | MCAM        | ANXA1    | NFKBID     | ADGRL4            | ITIH4       | CEMIP2   | LMAN1        |
| 50   | TMSB10       | PERP           | S100A10      | PHLDA1      | RPL19    | EZR        | FCN2              | MT-ND1      | ID2      | NCOA3        |

## Supplementary Table 16. Related to Figure S5

### Marker genes enriched in clustering of cancer cells (scRNAseq)

| Rank | mixed    | PT44      | PT54    | PT54 activated | PT61 activated | PT61        |
|------|----------|-----------|---------|----------------|----------------|-------------|
| 1    | B2M      | HSPA1A    | CEACAM5 | FABP1          | RPL30          | IRS2        |
| 2    | FTL      | MALAT1    | FABP1   | RPL39          | RPL8           | MCF2L       |
| 3    | TMSB4X   | XIST      | TFF3    | RPL13          | RPS18          | NEAT1       |
| 4    | ACTB     | NEAT1     | FXYD3   | RPL37          | RPL12          | ARHGEF7     |
| 5    | TIMP1    | ARGLU1    | PHGR1   | RPL26          | RPS6           | ATP11A      |
| 6    | SPP1     | KCNQ1OT1  | ARID3A  | RPL13A         | RPS27A         | SOX4        |
| 7    | PLA2G2A  | SAT1      | RRBP1   | RPL32          | RPS3A          | ANKRD10     |
| 8    | LYZ      | INTS6     | GPRC5A  | RPL41          | RPL9           | NOTUM       |
| 9    | S100A6   | POLR2J3   | CEACAM6 | RPL21          | RPS7           | BRD2        |
| 10   | S100A11  | WSB1      | LGALS4  | RPLP1          | RPL17          | TUBGCP3     |
| 11   | FN1      | HNRNPH1   | PCK1    | RPL10          | RPL7           | HSPA1B      |
| 12   | ALB      | HNRNPU    | ELF3    | TFF3           | RPL37A         | HSPD1       |
| 13   | SERPINA1 | SQSTM1    | SLC12A2 | RPS15A         | RPS29          | ING1        |
| 14   | SH3BGRL3 | FOSB      | IER3    | RPS27          | RPS2           | NFIA        |
| 15   | CD63     | CYP3A5    | FERMT1  | RPS21          | RPS13          | MT-ND3      |
| 16   | MYL12B   | NUFIP2    | PMEP1A  | RPS28          | RPS26          | MT-ND2      |
| 17   | IFI27    | HNRNPA2B1 | XIST    | RPS4X          | RPS12          | MT-ND1      |
| 18   | VIM      | RNF213    | DSTN    | RPS19          | NME2           | AKAP9       |
| 19   | TAGLN    | SFPQ      | SLC26A2 | RPS14          | IFITM3         | PITX2       |
| 20   | IFI6     | LRBA      | KRT8    | RPL36A         | SNHG6          | PTPRD       |
| 21   | CD74     | SON       | ARGLU1  | S100A6         | IGKC           | HSP90AA1    |
| 22   | TYROBP   | HSPH1     | NORAD   | RPL28          | HLA-A          | KAT6A       |
| 23   | EMP3     | ZKSCAN1   | PLCG2   | RPS12          | RPL5           | CLK1        |
| 24   | SERPINA3 | SRRM2     | CSNK2A1 | RPL29          | IRS2           | AGO2        |
| 25   | IL32     | FTX       | KIF16B  | RPS16          | UQCRB          | HSPB1       |
| 26   | HLA-B    | N4BP2L2   | CLDN3   | RPS15          | RPL27          | MT-ND4L     |
| 27   | S100A8   | DST       | CST3    | PHGR1          | RPL39          | VEGFA       |
| 28   | COL1A2   | DDX3X     | NEAT1   | RPS11          | MIF            | ARID1B      |
| 29   | LGALS1   | PLOD3     | LGALS3  | TPT1           | ASPSR1         | KLF5        |
| 30   | APOE     | RNF43     | SPTBN1  | RPL35          | CCL4           | MYLIP       |
| 31   | CXCL5    | CSNK1A1   | TPM4    | RPL18A         | EEF1G          | AXIN2       |
| 32   | KRT7     | ZBTB7A    | RPL37   | RPL23A         | GZMA           | MT-ND4      |
| 33   | TPT1     | SNHG14    | SPINT2  | EEF1A1         | RPL41          | ANKRD10-IT1 |
| 34   | VCAN     | TRA2B     | CSTB    | RPL36          | RPLP1          | RBM39       |
| 35   | SRGN     | FOXP1     | SOX4    | RPS23          | RPS25          | HSPH1       |
| 36   | MYL12A   | FOS       | CKB     | RPL7A          | GNLY           | JUN         |
| 37   | IFITM3   | TRIM56    | YWHAB   | RPL35A         | FTH1           | UBR5        |
| 38   | CXCL8    | RRBP1     | SNRPB   | FXYD3          | RPS10          | ID4         |
| 39   | CCL2     | PLEC      | CD9     | RPS24          | RPL7A          | MSI2        |
| 40   | A2M      | KMT2C     | CDH17   | RPL14          | HSP90AA1       | CHD7        |
| 41   | SPARC    | TAF1D     | SNRPB2  | RPL6           | EEF1A1         | HSPE1       |
| 42   | MMP7     | TMF1      | MUC12   | RPL24          | RPL10          | MTDH        |
| 43   | FGG      | PTP4A2    | GSTP1   | RPS17          | RPS3           | MALAT1      |
| 44   | C3       | LMNA      | PTBP3   | RPS6           | CCL4L2         | DNAJB6      |
| 45   | BST2     | KLF6      | LDHA    | GAPDH          | ALDH1A1        | MT-ATP6     |
| 46   | KRT23    | ANKRD12   | EPB41L2 | RPS18          | NOTUM          | SPTAN1      |
| 47   | LAPTM5   | MUC17     | EDN1    | RPL19          | PABPC1         | DNAJA1      |
| 48   | FGA      | DDX5      | CLDN4   | RPL31          | RPL34          | GCC2        |
| 49   | PMP22    | PIGR      | S100A10 | RPS5           | RPS24          | MUC6        |
| 50   | MSN      | CXCL5     | VEGFA   | RPL18          | RPL3           | FOXQ1       |

## Supplementary Table 17. Related to Figure 5

### Marker genes enriched in clustering of endothelial cells (scRNAseq)

| Rank | Neovascular |                | Altered     |           | Activated |           | Lymphatic |
|------|-------------|----------------|-------------|-----------|-----------|-----------|-----------|
|      | Artery      | Capillary-Like | Capillary   | Vein-Like | Vein      |           |           |
| 1    | PLVAP       | PODXL          | MEG3        | FCN3      | IL1R1     | MGP       | CCL21     |
| 2    | SPARCL1     | CXCL12         | AKAP12      | MS4A6A    | NR2F1     | IL33      | PROX1     |
| 3    | SPARC       | JAG1           | HERC1       | CRHBP     | PRSS23    | ATP13A3   | DST       |
| 4    | SPRY1       | A2M            | JUN         | CTSL      | LIFR      | EMP1      | DOCK5     |
| 5    | RGCC        | SLC9A3R2       | SLC2A3      | DNASE1L3  | PTGDS     | CPE       | PKHD1L1   |
| 6    | COL4A1      | TIMP3          | INTS6       | LYVE1     | PLAC8     | ADAMTS1   | MMRN1     |
| 7    | COL4A2      | KCTD12         | ADAMTS4     | FCN2      | SELE      | TM4SF1    | SEMA3A    |
| 8    | APOLD1      | SEMA3G         | SOX4        | CLEC4G    | SELP      | LDB2      | EPB41L2   |
| 9    | ITGA6       | SRP14          | MACF1       | CCL14     | TSHZ2     | ST8SIA6   | LAMA4     |
| 10   | COL15A1     | S100A6         | SRSF3       | CLEC4M    | PLCB1     | AQP1      | MAP1B     |
| 11   | HSPA1A      | MECOM          | SYNE1       | OIT3      | ADGRG6    | TGM2      | ABI3BP    |
| 12   | VWA1        | GSN            | BRD2        | CLEC1B    | SOD2      | PLPP3     | PTPRE     |
| 13   | FLT1        | CD34           | NTN4        | MT-ATP6   | C7        | CLU       | CALD1     |
| 14   | MCF2L       | ADAMTS6        | SNHG5       | MT-ND3    | RSPO3     | ADIRF     | TFF3      |
| 15   | ENG         | CLDN5          | NRP1        | STAB1     | MIR99AHG  | FAM107A   | LIMS1     |
| 16   | BTNL9       | PALMD          | PCDH9       | SELENOP   | SLC38A2   | RFK       | DUXAP8    |
| 17   | TCF4        | CAV1           | IER2        | MT-ND5    | INMT      | FOSB      | OLFML2A   |
| 18   | EDNRB       | IFI27          | HES1        | FTL       | PELI2     | CEBPD     | REEP1     |
| 19   | ARHGAP29    | PECAM1         | MEG8        | MT-ND1    | RAMP3     | SLCO2A1   | USP53     |
| 20   | IGFBP4      | PLPP1          | PHACTR2     | MT-ND4    | TAGLN     | CLEC14A   | LAMC1     |
| 21   | HSPA1B      | CHRM3          | ANGPT2      | MT-ND2    | CRIM1     | SRGN      | XIST      |
| 22   | JDP2        | ARL15          | EGLN3       | MAF       | CFLAR     | F8        | TSPAN5    |
| 23   | KDR         | HEG1           | ATF3        | MT-ND4L   | DGKG      | INSR      | KLF6      |
| 24   | CTNNB1      | UTRN           | ZEB2        | ACSM3     | TCIM      | YBX3      | PPFIBP1   |
| 25   | IVNS1ABP    | ITPRID2        | NABP1       | ALB       | NXPE3     | FLRT2     | FLT4      |
| 26   | SPRY4       | JAG2           | DAAM1       | MRO       | UGCG      | ZFP36     | MARCKS    |
| 27   | HSPG2       | SERPINE2       | PRICKLE2    | CD4       | MRC1      | C11orf96  | TBX1      |
| 28   | PDGFD       | ADGRL4         | C6orf62     | MARCKSL1  | NAMPT     | ATP1A1    | FILIP1L   |
| 29   | GRB10       | PIK3R3         | DDX3Y       | STAB2     | RAB3C     | VWF       | BMP2K     |
| 30   | SEC14L1     | VIM            | ARHGEF7     | RELN      | C1QTNF1   | PTPRB     | PLSCR4    |
| 31   | ADGRL2      | PCSK5          | GSK3A       | CXCL16    | DLC1      | RAPH1     | ST3GAL6   |
| 32   | LAMB1       | EPAS1          | SLC20A1     | CD36      | FGFR1     | MMRN2     | GAS7      |
| 33   | RPS15       | EFNB2          | JAK1        | LGMN      | SGK1      | GAS6      | LGALS1    |
| 34   | ACTG1       | HLA-C          | ZFP36L1     | SLC7A8    | SLC25A37  | TACC1     | TBL1XR1   |
| 35   | TSC22D3     | TMEM47         | IGLC2       | MTRNR2L12 | ACTN1     | CD9       | TC2N      |
| 36   | RPS12       | RAMP2          | SRSF7       | COTL1     | MEIS2     | DUSP1     | STX7      |
| 37   | F2RL3       | SYNE2          | TRIM69      | HIPK2     | PTGIS     | RASGEF1B  | IGF1      |
| 38   | RPL15       | KCNN3          | IGF1R       | NR5A2     | PGM5      | JUNB      | SNCG      |
| 39   | RPS3        | NES            | H19         | IFITM10   | NEAT1     | ABCG2     | STON2     |
| 40   | CA2         | MAP4           | JMJD6       | NPL       | VPS13A    | SOCS3     | ADD3      |
| 41   | RPL34       | KLF2           | THUMPD3-AS1 | FTH1      | IER3      | BMPER     | ABLIM1    |
| 42   | GNG11       | CRYBG3         | PRX         | CD14      | LRATD2    | CXCL2     | IGFBP5    |
| 43   | DDIT4       | CAVIN1         | MID1        | ANKS1A    | PDLIM5    | MT2A      | DDX17     |
| 44   | RPS18       | FUT8           | ING1        | EHD3      | SESN3     | LMNA      | RAB11FIP1 |
| 45   | JCAD        | PDGFB          | DENND4C     | FCGR2B    | FGL2      | MYADM     | NNMT      |
| 46   | NFIB        | ADGRF5         | SMAD6       | CTSD      | FUS       | HIF1A     | PLCG2     |
| 47   | SERPINE1    | NEBL           | CTBP2       | RFLNB     | CEMIP2    | NDRG1     | GNG12     |
| 48   | RPS8        | SLFN5          | LINC00963   | ABCA9     | LTC4S     | LINC-PINT | EFNA5     |
| 49   | MGLL        | VEGFC          | USP13       | ME2       | AFF1      | TSPAN7    | TRMT9B    |
| 50   | GASK1B      | CD81           | PARP14      | MTRNR2L8  | TIMP1     | IGFBP7    | CRYAB     |

## Supplementary Table 18. Related to Figure 6.

### Marker genes uniquely enriched in clustering of capillaries (scRNAseq)

| Rank | Altered<br>Capillary-Like | Capillary #1 | Capillary PT54<br>specific | Capillary PT44<br>specific | Capillary #2 |
|------|---------------------------|--------------|----------------------------|----------------------------|--------------|
| 1    | ADAMTS1                   | CCL14        | XIST                       | HSPH1                      | CLEC4M       |
| 2    | EMP1                      | SELENOP      | NEAT1                      | ALB                        | SLC40A1      |
| 3    | VIM                       | FTL          | GOLGB1                     | HSP90AA1                   | KDR          |
| 4    | CLEC14A                   | TMSB4X       | JMJD1C                     | DNAJB1                     | STAB2        |
| 5    | TCF4                      | RPL39        | PLCG2                      | HSPA1A                     | PLPP3        |
| 6    | FOSB                      | TPT1         | ZBTB16                     | MT-ND4L                    | NRP1         |
| 7    | LMNA                      | RPS12        | BTNL9                      | HSPD1                      | LGMN         |
| 8    | SNHG5                     | FCN3         | TCIM                       | MT-ND3                     | LPAR6        |
| 9    | A2M                       | RPLP1        | TACC1                      | EGR1                       | EGFL7        |
| 10   | ATP13A3                   | RPL10        | HYAL2                      | MTRNR2L8                   | OIT3         |
| 11   | MGP                       | RPS28        | KLF9                       | MT-ND5                     | MEG3         |
| 12   | JUNB                      | RPS18        | AKAP12                     | HSPA1B                     | FCN2         |
| 13   | TM4SF1                    | EEF1A1       | XAF1                       | MT-ATP6                    | MEIS2        |
| 14   | INTS6                     | RPS23        | KLF6                       | CHORDC1                    | PARP14       |
| 15   | JUN                       | RPL28        | CEMIP2                     | MT-ND4                     | FZD4         |
| 16   | FLT1                      | RPS4X        | LINC-PINT                  | ACSM3                      | CRHBP        |
| 17   | DUSP1                     | B2M          | RRBP1                      | MT-ND1                     | ENG          |
| 18   | ID1                       | RPL34        | ODF2L                      | MT-ND2                     | CD4          |
| 19   | SLC2A3                    | RPL37        | NAMPT                      | APOC1                      | NTN4         |
| 20   | ADAMTS4                   | RPS6         | SLC38A2                    | MTRNR2L12                  | ARHGAP29     |
| 21   | NR4A1                     | FTH1         | CCNL1                      | HSPB1                      | STAB1        |
| 22   | SOX4                      | TMSB10       | RPGR                       | ABCA9                      | EHD3         |
| 23   | AHNAK                     | RPS8         | SERPINB6                   | APOA2                      | MEG8         |
| 24   | BRD2                      | RPS15A       | ANKS1A                     | MT-ATP8                    | IL6ST        |
| 25   | EGR3                      | RPL37A       | NASP                       | ZDHHC21                    | ST6GAL1      |
| 26   | NDRG1                     | SERF2        | APOLD1                     | APOA1                      | ITGA1        |
| 27   | ATP1A1                    | RPL12        | KAT6A                      | DNAJA4                     | SEMA6A       |
| 28   | MYADM                     | IFITM3       | ZNF160                     | APOC3                      | RELN         |
| 29   | JUND                      | RPS3         | HECW2                      | AFF1                       | N4BP2L2      |
| 30   | EPAS1                     | IFI27        | RASGEF1B                   | APOE                       | CLEC1B       |
| 31   | GAS5                      | RPS27        | ZFP36                      | DNAJB4                     | ZFP36L1      |
| 32   | NR4A2                     | RPLP2        | LINC00472                  | HSP90AB1                   | MTRNR2L1     |
| 33   | CD74                      | RPL30        | INSR                       | C1QB                       | TGFBR3       |
| 34   | ADAMTS9                   | RPS3A        | AKAP13                     | TTR                        | NKTR         |
| 35   | IRF2BP2                   | RPL35A       | WSB1                       | CCDC144A                   | ARGLU1       |
| 36   | ADIRF                     | RPL13        | YBX3                       | BAG3                       | PRCP         |
| 37   | MYH9                      | RPS27A       | PTPRB                      | LAMB1                      | DAB2         |
| 38   | BTG1                      | RPL3         | RBM39                      | HSPA6                      | DNASE1L3     |
| 39   | EFNB2                     | RPL41        | CTTNBP2NL                  | ARHGEF28                   | TUT4         |
| 40   | NFIB                      | RPL32        | TLR4                       | FGB                        | NR2F1        |
| 41   | ABCG2                     | RPS13        | SYNE1                      | HSPE1                      | TGFBR2       |
| 42   | SRSF3                     | RPS2         | PPFIBP1                    | ATRNL1                     | MRC1         |
| 43   | LTBP4                     | RPL26        | NOSTRIN                    | APOH                       | NRP2         |
| 44   | PECAM1                    | TIMP1        | LRATD1                     | TF                         | HERC1        |
| 45   | UTRN                      | RPS14        | RBM5                       | DNAJB6                     | DDX17        |
| 46   | TUBA1A                    | RPL7A        | FKBP5                      | MRO                        | HLA-A        |
| 47   | ATF3                      | RPL11        | ZEB2                       | APOB                       | PHLDB2       |
| 48   | CAV1                      | CALM1        | PIK3C2A                    | ALDOB                      | HLA-E        |
| 49   | FOXP1                     | RPL9         | SHANK3                     | SESN3                      | MS4A6A       |
| 50   | SOX18                     | RPL19        | SMCHD1                     | GALNT1                     | ETS1         |

## Supplementary Table 19. Related to Figure 6

### GSEA capillaries (scRNAseq)

| Set                                                                                                                                        | Enrichment score | NES         | Direction | Pvalue     | Adjusted pvalue |
|--------------------------------------------------------------------------------------------------------------------------------------------|------------------|-------------|-----------|------------|-----------------|
| GOBP_NEGATIVE_REGULATION_OF_GLIAL_CELL_DIFFERENTIATION                                                                                     | 0,94674947       | 1,52893503  | Up        | 0,00010787 | 0,00377956      |
| GOBP_ENDOTHELIUM_DEVELOPMENT                                                                                                               | 0,82983174       | 1,52461864  | Up        | 0,00010011 | 0,00373528      |
| GOBP_SYMPATHETIC_NERVOUS_SYSTEM_DEVELOPMENT                                                                                                | 0,93403199       | 1,51725625  | Up        | 0,00010756 | 0,00377956      |
| GOBP_LIMB_BUD_FORMATION                                                                                                                    | 0,95721069       | 1,50998578  | Up        | 0,00043621 | 0,00913182      |
| GOBP_ESTABLISHMENT_OF_ENDOTHELIAL_BARRIER                                                                                                  | 0,85415626       | 1,50932408  | Up        | 0,00010233 | 0,00373528      |
| GOBP_EMBRYONIC_DIGESTIVE_TRACT_MORPHOGENESIS                                                                                               | 0,92990523       | 1,50173274  | Up        | 0,00021575 | 0,00578997      |
| GOBP_ENDOTHELIAL_CELL_DEVELOPMENT                                                                                                          | 0,83697602       | 1,50018237  | Up        | 0,00010148 | 0,00373528      |
| GOBP_POSITIVE_REGULATION_OF_BLOOD_PRESSURE                                                                                                 | 0,88454987       | 1,49979699  | Up        | 0,00010513 | 0,00373528      |
| GOBP_NEGATIVE_REGULATION_OF_CELL_FATE_COMMITMENT                                                                                           | 0,95416966       | 1,49338655  | Up        | 0,00076645 | 0,01315289      |
| GOBP_REGULATION_OF_ENDOTHELIAL_CELL_DIFFERENTIATION                                                                                        | 0,86343336       | 1,4923024   | Up        | 0,00010397 | 0,00373528      |
| GOBP_POSITIVE_REGULATION_OF_CYTOSOLIC_CALCIUM_ION_CONCENTRATION_INVOLVED_IN_PHOSPHOLIPASE_C_ACTIVATING_G_PROTEIN_COUPLED_SIGNALING_PATHWAY | 0,87233401       | 1,49154292  | Up        | 0,00010481 | 0,00373528      |
| GOBP_PERICARDIUM_DEVELOPMENT                                                                                                               | 0,9068561        | 1,48842487  | Up        | 0,0003211  | 0,00739732      |
| REACTOME_DISEASES_ASSOCIATED_WITH_O_GLYCOSYLATION_OF_PROTEINS                                                                              | 0,83069229       | 1,48488066  | Up        | 0,00010166 | 0,00373528      |
| GOBP_CELL_DIFFERENTIATION_INVOLVED_IN_KIDNEY_DEVELOPMENT                                                                                   | 0,83433044       | 1,48212159  | Up        | 0,00010207 | 0,00373528      |
| GOBP_ESTABLISHMENT_OF_ENDOTHELIAL_INTESTINAL_BARRIER                                                                                       | 0,93306935       | 1,48172176  | Up        | 0,00097815 | 0,01546193      |
| GOBP_COLLAGEN_CATABOLIC_PROCESS                                                                                                            | -0,67363246      | -1,73843326 | Down      | 0,00319489 | 0,03149347      |
| REACTOME_ACTIVATION_OF_MATRIX_METALLOPROTEINASES                                                                                           | -0,74097572      | -1,75163831 | Down      | 0,00212314 | 0,02461406      |
| REACTOME_COMPLEX_I_BIOGENESIS                                                                                                              | -0,62409761      | -1,75646491 | Down      | 0,00549451 | 0,04156106      |
| GOBP_DEFENSE_RESPONSE_TO_FUNGUS                                                                                                            | -0,76691612      | -1,76430838 | Down      | 0,00188679 | 0,02287482      |
| REACTOME_ACTIVATION_OF_THE_MRNA_UPON_BINDING_OF_THE_CAP_BINDING_COMPLEX_AND_EIF5_AND_SUBSEQUENT_BINDING_TO_43S                             | -0,62910385      | -1,78599603 | Down      | 0,00578035 | 0,04276154      |
| GOBP_CATECHOLAMINE_UPTAKE                                                                                                                  | -0,85862876      | -1,80793844 | Down      | 0,00524246 | 0,04075441      |
| GOBP_RESPONSE_TO_UV_A                                                                                                                      | -0,89156767      | -1,80889561 | Down      | 0,00499376 | 0,03967689      |
| REACTOME_DEFENSINS                                                                                                                         | -0,93228303      | -1,81152162 | Down      | 0,00115075 | 0,01696921      |
| REACTOME_SCAVENGING_OF_HEME_FROM_PLASMA                                                                                                    | -0,6612821       | -1,8611172  | Down      | 0,00549451 | 0,04156106      |
| GOBP_MITOCHONDRIAL_ELECTRON_TRANSPORT_NADH_TO_UBIQUINONE                                                                                   | -0,71091673      | -1,94292535 | Down      | 0,00487805 | 0,03917483      |
| GOBP_INNATE_IMMUNE_RESPONSE_IN_MUCOSA                                                                                                      | -0,94520457      | -1,94726386 | Down      | 0,00129366 | 0,01807302      |
| GOBP_ATP_SYNTHESIS_COUPLED_PROTON_TRANSPORT                                                                                                | -0,8388538       | -1,95628449 | Down      | 0,00204082 | 0,02394525      |
| REACTOME_FORMATION_OF_ATP_BY_CHEMIOSMOTIC_COUPLING                                                                                         | -0,90765488      | -1,98530951 | Down      | 0,00151745 | 0,02008439      |
| GOBP_MITOCHONDRIAL_ATP_SYNTHESIS_COUPLED_PROTON_TRANSPORT                                                                                  | -0,88928909      | -2,03054453 | Down      | 0,00175439 | 0,02207316      |
| REACTOME_CREATION_OF_C4_AND_C2_ACTIVATORS                                                                                                  | -0,90924353      | -2,58129931 | Down      | 0,00578035 | 0,04276154      |

## Supplementary Table 20. related to Figure 6

### Top 150 enriched marker genes of ACL endothelial cluster

| <u>Rank</u> | <u>Gene name</u> | <u>Rank</u> | <u>Gene name</u> | <u>Rank</u> | <u>Gene name</u> |
|-------------|------------------|-------------|------------------|-------------|------------------|
| 1           | AKAP12           | 51          | ARHGAP29         | 101         | ABCG2            |
| 2           | FLT1             | 52          | EGFL7            | 102         | IER2             |
| 3           | PLPP3            | 53          | EGR1             | 103         | NOTCH4           |
| 4           | TCF4             | 54          | MAF              | 104         | SASH1            |
| 5           | CCL14            | 55          | ETS1             | 105         | PREX2            |
| 6           | MEG3             | 56          | TGFBR3           | 106         | CDH5             |
| 7           | INSR             | 57          | ID1              | 107         | NR4A1            |
| 8           | PTPRB            | 58          | BHLHE40          | 108         | DAAM1            |
| 9           | SLC2A3           | 59          | TACC1            | 109         | ZFP36            |
| 10          | JUN              | 60          | ITPRIP           | 110         | CCDC50           |
| 11          | CRHBP            | 61          | GRB10            | 111         | SPTBN1           |
| 12          | LDB2             | 62          | HSPG2            | 112         | MIR99AHG         |
| 13          | DNASE1L3         | 63          | SRSF3            | 113         | LIMCH1           |
| 14          | F8               | 64          | PHACTR2          | 114         | PARP14           |
| 15          | EPAS1            | 65          | WWTR1            | 115         | EGR3             |
| 16          | MACF1            | 66          | PLK2             | 116         | CNKSR3           |
| 17          | LIFR             | 67          | IL6ST            | 117         | DLC1             |
| 18          | SYNE1            | 68          | SLC38A2          | 118         | LMNA             |
| 19          | SEC14L1          | 69          | TFPI2            | 119         | ARHGEF12         |
| 20          | HERC1            | 70          | RDX              | 120         | DUSP6            |
| 21          | ADAMTS4          | 71          | NEAT1            | 121         | C6orf62          |
| 22          | EMP1             | 72          | UTRN             | 122         | ATF3             |
| 23          | BTNL9            | 73          | FOS              | 123         | FOXO1            |
| 24          | ADAMTS1          | 74          | HNRNPU           | 124         | ARRDC3           |
| 25          | FOSB             | 75          | ST6GAL1          | 125         | NRP2             |
| 26          | NRP1             | 76          | DDX3X            | 126         | PPP1R10          |
| 27          | KDR              | 77          | SOX4             | 127         | TGFBR2           |
| 28          | IL33             | 78          | STAB1            | 128         | YBX3             |
| 29          | RAPGEF5          | 79          | SLC25A37         | 129         | IGF1R            |
| 30          | FCN3             | 80          | BRD2             | 130         | HIPK2            |
| 31          | JUND             | 81          | MEIS2            | 131         | GBP4             |
| 32          | CLEC14A          | 82          | JUNB             | 132         | IFRD1            |
| 33          | EFNB2            | 83          | PRSS23           | 133         | CRIM1            |
| 34          | A2M              | 84          | DEPP1            | 134         | IL1R1            |
| 35          | MEF2C            | 85          | NEDD9            | 135         | MIDN             |
| 36          | TCIM             | 86          | FILIP1           | 136         | EGLN3            |
| 37          | CD36             | 87          | PCDH17           | 137         | MRC1             |
| 38          | HES1             | 88          | MYADM            | 138         | EIF4G3           |
| 39          | HECW2            | 89          | SNHG5            | 139         | EMCN             |
| 40          | PPFIBP1          | 90          | XAF1             | 140         | SFPQ             |
| 41          | JMJD1C           | 91          | SOX18            | 141         | SNRK             |
| 42          | DUSP1            | 92          | ARGLU1           | 142         | MAG1             |
| 43          | SYNE2            | 93          | CALCRL           | 143         | SOCS3            |
| 44          | TM4SF1           | 94          | CLEC4M           | 144         | CAVIN2           |
| 45          | TFPI             | 95          | RAPGEF2          | 145         | ANGPT2           |
| 46          | ADGRF5           | 96          | ATP13A3          | 146         | CDK17            |
| 47          | INTS6            | 97          | NFIB             | 147         | MEG8             |
| 48          | NTN4             | 98          | ZFP36L1          | 148         | LPAR6            |
| 49          | F2R              | 99          | DOCK4            | 149         | MID1             |
| 50          | GNG11            | 100         | TGM2             | 150         | NR2F1            |



## Supplementary Table 21. Related to Figure 3

### Primers used for rtPCR

| Target | RefSeq accession | Forward                             | Reverse                             |
|--------|------------------|-------------------------------------|-------------------------------------|
| Dkk1   | NM_012242.4      | 5' - AGTGTGTACCAAGCATAGGAGAAAA - 3' | 5' - TTAGTGTCTCTGACAAGTGTGAAGC - 3' |
| Dkk4   | NM_014420.3      | 5' - TCACAAGGCAGGAAGGGACA - 3'      | 5' - GTCGCAACGCTGGAAGATTT - 3'      |
| Lrp6   | NM_002336.3      | 5'- CACTTACTCCCTGCAATTTTGAACC - 3'  | 5' - TGGCCTGTAGCTGTATGACCTATG - 3'  |

*Note: all primers supplied by IDT DNA Technologies*
